# Supplementary material for: The Relationship between Red Cell Distribution Width and Residual SYNTAX Scores in ST-Segment Elevation Myocardial Infarction Patients after Percutaneous Coronary Intervention
Source: Hindawi journal article supplement (doi:10.1155/2021/3281837), 2021-12-15

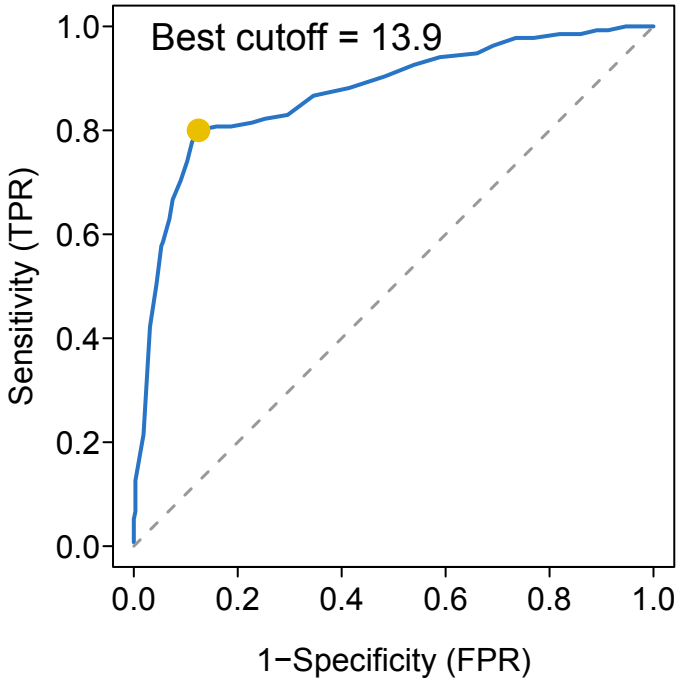

Supplement: f1 [file 3281837.f1.pdf]
